# Supplementary material for: Rate of glycaemic control and associated factors in patients with type 2 diabetes mellitus treated with insulin-based therapy at selected hospitals in Northwest Ethiopia: a multicentre cross-sectional study
Source: HighWire-hosted journal article supplement (doi:10.1136/bmjopen-2022-065250), 2022-09-01
Supplement: bmjopen-2022-065250supp001_data_supplement.pdf [file bmjopen-2022-065250supp001_data_supplement.pdf]

**Sendekie AK et al.**

### **Informed consent and Data collection tools**

#### **1. Informed Consent form**

Dear participant,

We are from University of Gondar and Debre Markos university research teams, and we would like to kindly request your consent to participate on the study. The aim of this study is to assess “Rate of glycemic control and associated factors in type 2 diabetes mellitus patients treated with insulin-based therapy at the selected hospitals of Northwest Ethiopian”. This is a cross-sectional study; the questioner comprises of questions regarding your socio-demographics information, clinical characteristics, medications that used to treat your problems. This questionnaire will hardly take your 5-6 minutes and all the information we obtain will remain strictly confidential and your answer and name will never be revealed. We assure you that it is totally a voluntary participation and feel free to refuse or to withdraw at any point in the study.

Do you agree to participate in this study?    1. Yes ----                    2. No ----

If yes, please ready for interview for the following socio-demographic and some clinical characteristics questions, the rest will take from your medical records.

## **II. Data collection tools**

### **I. Patients’ socio-demographic characteristics**

| <b>Variables</b>                                      | <b>Category</b>                                  |
|-------------------------------------------------------|--------------------------------------------------|
| Sex                                                   | 1. Male    2. Female                             |
| Age (in years)                                        | ---                                              |
| Wight                                                 | ---                                              |
| Height                                                | ---                                              |
| Body mass index (BMI)                                 | ---                                              |
| Duration of diabetes mellitus since diagnosis (years) | ----                                             |
| Residence                                             | 1. Urban    2. Rural                             |
| Education status                                      | 1. Unable to write and read<br>2. Primary school |

**Sendekie AK et al.**

|                                         |                                                                    |
|-----------------------------------------|--------------------------------------------------------------------|
|                                         | 3. Secondary school<br>4. College and University                   |
| Use health insurance                    | 1. Yes 2. No                                                       |
| Self-monitoring of blood glucose (SMBG) | 1. Yes 2. No                                                       |
| Smoking status                          | 1. Currently smoker<br>2. Previously smoker<br>3. Nonsmoker at all |
| Work related/physical activity/day      | 1. Sedentary<br>2. Moderate<br>3. Vigorous                         |
| Family history of T2DM                  | 1. Yes<br>2. No                                                    |

**II. Clinical characteristics of insulin treated patients type 2 diabetes mellitus**

|                          |                            |                                                                             |
|--------------------------|----------------------------|-----------------------------------------------------------------------------|
| <b>Characteristics</b>   |                            |                                                                             |
| Blood pressure records   |                            | Systolic blood pressure (SBP) ----<br>Diastolic blood pressure (DBP) ----   |
| <b>Laboratory values</b> |                            |                                                                             |
| Blood glucose level      | HbA1c (%) (three records ) | HbA1C1 _____<br>HbA1C 2 _____<br>HbA1C3 _____<br><b>Average HbA1C</b> _____ |
|                          | FBG (mg/dl)                | FBG1 _____<br>FBG2 _____<br>FBG3 _____<br>Average FBG _____                 |
| Lipid profiles           | LDL-Cholesterol            |                                                                             |
|                          | HDL-Cholesterol            |                                                                             |
|                          | Total triglyceride         |                                                                             |
|                          | Total-Cholesterol          |                                                                             |
| Renal function test      | Creatinine(mg/dl)          |                                                                             |
|                          |                            |                                                                             |
| Electrolytes             | Na+                        |                                                                             |
|                          | K+                         |                                                                             |

Sendekie AK et al.

| <b>Complications and comorbidities</b> |  |
|----------------------------------------|--|
| Hypertension                           |  |
| Dyslipidemia                           |  |
| Renal problems (CKD, AKI)              |  |
| Macrovascular complications            |  |
| Microvascular complications            |  |
| Bacterial infections                   |  |
| Diabetic ketoacidosis                  |  |
| Hypoglycemia                           |  |
| Other complications                    |  |
|                                        |  |
|                                        |  |
|                                        |  |

### III. Medications with daily doses of insulin treated patients with type 2 diabetes mellitus

| Medications              |                                                  | Average daily doses (if necessary, particularly for antidiabetic and lipid-lowering agents is a must) |
|--------------------------|--------------------------------------------------|-------------------------------------------------------------------------------------------------------|
| Antidiabetic medications | Metformin                                        |                                                                                                       |
|                          | Glibenclamide                                    |                                                                                                       |
|                          | Insulin (NPH or Premixed)                        |                                                                                                       |
| Type of insulin regimens | NPH                                              |                                                                                                       |
|                          | Premixed                                         |                                                                                                       |
| Antihypertensive agents  | Angiotensin converting enzyme inhibitors (ACEIs) |                                                                                                       |
|                          | Calcium channel blockers (CCBs)                  |                                                                                                       |
|                          | Beta-blockers                                    |                                                                                                       |
|                          | Angiotensin converting enzyme inhibitors (ACEIs) |                                                                                                       |
| Lipid lowering agents    | Simvastatin                                      |                                                                                                       |
|                          | Atorvastatin                                     |                                                                                                       |
|                          | Lovastatin                                       |                                                                                                       |
| Others                   | Aspirin                                          |                                                                                                       |
|                          | Amitriptyline                                    |                                                                                                       |
|                          |                                                  |                                                                                                       |
|                          |                                                  |                                                                                                       |
|                          |                                                  |                                                                                                       |
|                          |                                                  |                                                                                                       |

**Note:** => HbA1C1 and/or FBG should be taken the records of three consecutive samples at least one month apart, and the average of the three records could be taken as current glycemic level.

**Sendekie AK et al.**

- ⇒ Doses of medications could be taken from the average doses of respective follow-up times.
